# Supplementary material for: Intrinsic folding of the cysteine residue: competition between folded and extended forms mediated by the –SH group
Source: Royal Society of Chemistry journal article supplement (doi:10.1039/d0cp03136d), 2020-01-01

# Intrinsic folding of the cysteine residue: competition between folded and extended forms mediated by the -SH group

Gildas Goldsztejn,<sup>‡</sup> Venkateswara-Rao Mundlapati, Valérie Brenner, Eric Gloaguen, Michel Mons\*

*LIDYL, CEA, CNRS, Université Paris-Saclay, bât 522, CEA Paris –Saclay, 9119 Gif-sur-Yvette, France*

and

Carlos Cabezas,<sup>†</sup> Iker León, José Luis Alonso\*

*Grupo de Espectroscopía Molecular (GEM), Edificio Quifima, Laboratorios de Espectroscopia y Bioespectroscopia, Unidad Asociada CSIC, Parque Científico UVa, Universidad de Valladolid, 47011, Valladolid, Spain*

## Supplementary information

### Table of Contents

|                                                                                                                                                                                     |    |
|-------------------------------------------------------------------------------------------------------------------------------------------------------------------------------------|----|
| Table S1: Structural and energetic parameters of Z-Cys-NH <sub>2</sub>                                                                                                              | S2 |
| Table S2: Structural, energetic and vibrational parameters of the folded and extended structures of Ac-Cys-NH <sub>2</sub>                                                          | S2 |
| Table S3: Comparison of the structural, energetic and vibrational parameters of the C5 and C7 structures of Ac-Ala-NH <sub>2</sub> and Ac-Cys-NHMe                                  | S3 |
| Table S4: Dependence of the calculated rotational parameters of the lowest energy C5 and C7 conformers of Ac-Ala-NH <sub>2</sub> with the theoretical method and basis set employed | S3 |
| Table S5 : Dependence of the structural parameters of the lowest energy C5 and C7 conformers of Ac-Ala-NH <sub>2</sub> with the theoretical method and basis set employed           | S4 |
| Figure S1: Structure of the <i>trans</i> -Me-CONH-Me ... MeSH intermolecular complex at the DFT-D (RI-B97-D3/def2-TZVPPD) level of theory                                           | S5 |

**Table S1: Structural and energetic parameters of Z-Cys-NH<sub>2</sub> : effect of the Z-tail rotamerism on the folded and extended forms from the DFT-D (B97-D3/def2-TZVPPD) calculations (same legend as Table 1).**

| Molecule                                                     | Bn-O-CO-Cys-NH <sub>2</sub>        |         |       |                            |          |       |
|--------------------------------------------------------------|------------------------------------|---------|-------|----------------------------|----------|-------|
|                                                              | #1                                 |         |       | #2                         |          |       |
| Conformation                                                 | Folded                             |         |       | Extended                   |          |       |
| Structure                                                    | 5 <sup>γ</sup> ( <sup>γ</sup> 6)-7 |         |       | 5-6 <sup>γ</sup>           |          |       |
| Z-cap                                                        | gauche +                           | gauche- | trans | gauche-                    | gauche + | trans |
| Energetics (kJ/mol)                                          |                                    |         |       |                            |          |       |
| ΔE (electronic)                                              | 0                                  | 1.0     | 4.6   | 4.9                        | 5.4      | 9.1   |
| ΔH (0K)                                                      | 0                                  | 1.4     | 3.7   | 3.8                        | 4.5      | 6.6   |
| ΔG (300K)                                                    | 0                                  | 1.8     | 1.8   | 1.7                        | 3.2      | 2.8   |
| Interatomic distance (pm) (NBO ΣE <sub>HB</sub> ) (kcal/mol) |                                    |         |       |                            |          |       |
| NH <sub>Cys</sub> /NH <sub>2</sub> – O                       | 7 : 202 (6.2)                      | 203     | 203   | 5 : 215 (1.7)              | 215      | 215   |
| NH <sub>Cys</sub> /NH <sub>2</sub> – S                       | 5 <sup>γ</sup> : 261 (2.1)         | 261     | 261   | 6 <sup>γ</sup> : 249 (5.5) | 250      | 248   |
| SH – O                                                       | <sup>γ</sup> 6 : 238 (1.3)         | 237     | 238   |                            |          |       |

**Table S2: Structural, energetic and vibrational parameters of the folded and extended structures of Ac-Cys-NH<sub>2</sub> at the DFT-D (B97-D3/def2-TZVPPD) level of theory, for comparison with Tables 1 and 2 (same legend as Table 1).**

| Molecule                                    | Ac-Ala-NH <sub>2</sub> |          |
|---------------------------------------------|------------------------|----------|
|                                             | #1                     | #2       |
| Conformation                                | Folded                 | Extended |
| Structure <sup>a</sup>                      | f-7                    | 5-f      |
| Energetics (kJ/mol)                         |                        |          |
| ΔE (electronic)                             | 0                      | 6.0      |
| ΔH (0K)                                     | 0                      | 3.9      |
| ΔG (300K)                                   | 0                      | 1.0      |
| Interatomic distances (pm)                  |                        |          |
| NH <sub>Cys</sub> /NH <sub>2</sub> – O      | 7 : 206                | 5 : 220  |
| Vibrational frequencies (cm <sup>-1</sup> ) |                        |          |
| NH stretches sym. NH <sub>2</sub>           | 7 : 3369               |          |
| NH <sub>Ala</sub>                           |                        | 5 : 3442 |

a) The label f designates a free NH

**Table S3: Comparison of the structural, energetic and vibrational parameters of the C5 and C7 structures of Ac-Ala-NH<sub>2</sub> and Ac-Cys-NHMe at the DFT-D (RI-B97-D3(BJ)abc/def2-TZVPPD) level of theory.**

| Molecule                                          | Ac-Cys-NH <sub>2</sub>  |                                    |                       | Ac-Cys-NH-Me               |                                    |                       |
|---------------------------------------------------|-------------------------|------------------------------------|-----------------------|----------------------------|------------------------------------|-----------------------|
|                                                   |                         | #1                                 | #2                    |                            | #1                                 | #2                    |
| Conformation                                      |                         | folded                             | extended              |                            | folded                             | extended              |
| Structure                                         |                         | 5 <sup>γ</sup> ( <sup>γ</sup> 6)-7 | 5-6 <sup>γ</sup>      |                            | 5 <sup>γ</sup> ( <sup>γ</sup> 6)-7 | 5-6 <sup>γ</sup>      |
| Interatomic distances (pm)                        | NH <sub>Cys</sub> – O/S | 5 <sup>γ</sup> : 257               | 5 : 214               | NH <sub>Cys</sub> – O/S    | 5 <sup>γ</sup> : 261               | 5 : 215               |
|                                                   | NH <sub>2</sub> – O/S   | 7 : 200                            | 6 <sup>γ</sup> : 249  | NH <sub>C-term</sub> – O/S | 7 : 202                            | 6 <sup>γ</sup> : 249  |
| Scaled NH stretch frequencies (cm <sup>-1</sup> ) | NH <sub>Cys</sub> – O/S | 5 <sup>γ</sup> : 3408              | 5 : 3427              | NH <sub>Cys</sub> – O/S    | 5 <sup>γ</sup> : 3406              | 5 : 3421              |
|                                                   | NH <sub>2</sub> – O/S   | 7 : 3353                           | 6 <sup>γ</sup> : 3380 | NH <sub>C-term</sub> – O/S | 7 : 3322                           | 6 <sup>γ</sup> : 3379 |

**Table S4: Dependence of the calculated rotational parameters of the lowest energy C5 and C7 conformers of Ac-Ala-NH<sub>2</sub> with the theoretical method and basis set employed.**

| C7                    | B3LYP-D3(BJ)/def2-TZVP | B3LYP-D3(BJ)/def2-TZVPPD | B97-D3(BJ)/def2-TZVP | B97-D3(BJ)/def2-TZVPPD | RI-B97-D3(BJ)-abc/def2-TZVP | RI-B97-D3(BJ)-abc/def2-TZVPPD |
|-----------------------|------------------------|--------------------------|----------------------|------------------------|-----------------------------|-------------------------------|
| <b>A</b>              | 1475                   | 1475                     | 1459                 | 1459                   | 1453                        | 1453                          |
| <b>B</b>              | 833                    | 833                      | 829                  | 828                    | 829                         | 828                           |
| <b>C</b>              | 601                    | 600                      | 597                  | 597                    | 596                         | 596                           |
| Dipole moment (Debye) |                        |                          |                      |                        |                             |                               |
| Total                 | 2.2                    | 2.2                      | 2.0                  | 2.2                    | 2.0                         | 2.0                           |
| a/b/c components      | 1.7/1.4/0.2            | 1.7/1.5/0.2              | 1.6/1.2/0.2          | 1.7/1.5/0.1            | 1.5/1.4/0.2                 | 1.5/1.4/0.2                   |
| Energetics            | 0                      | 0                        | 0                    | 0                      | 0                           | 0                             |

| C5                    | B3LYP-D3(BJ)/def2-TZVP | B3LYP-D3(BJ)/def2-TZVPPD | B97-D3(BJ)/def2-TZVP | B97-D3(BJ)/def2-TZVPPD | RI-B97-D3(BJ)-abc/def2-TZVP | RI-B97-D3(BJ)-abc/def2-TZVPPD |
|-----------------------|------------------------|--------------------------|----------------------|------------------------|-----------------------------|-------------------------------|
| <b>A</b>              | 1432                   | 1431                     | 1423                 | 1423                   | 1421                        | 1423                          |
| <b>B</b>              | 781                    | 781                      | 771                  | 770                    | 770                         | 768                           |
| <b>C</b>              | 538                    | 538                      | 534                  | 534                    | 533                         | 533                           |
| Dipole moment (Debye) |                        |                          |                      |                        |                             |                               |
| Total                 | 1.5                    | 1.5                      | 1.6                  | 1.6                    | 1.6                         | 1.6                           |
| a/b/c components      | 1.3/0.8/0.3            | 1.3/0.8/0.3              | 1.3/0.8/0.3          | 1.3/0.8/0.4            | 1.3/0.8/0.3                 | 1.3/0.8/0.4                   |
| Energetics (kJ/mol)   |                        |                          |                      |                        |                             |                               |
| ΔH 0K                 | <b>6.3</b>             | <b>5.8</b>               | <b>5.8</b>           | <b>5.2</b>             | <b>5.6</b>                  | <b>5.0</b>                    |
| ΔG 300K               | <b>3.8</b>             | <b>3.3</b>               | <b>3.5</b>           | <b>2.8</b>             | <b>2.6</b>                  | <b>1.7</b>                    |

**Table S5 : Dependence of the structural parameters of the lowest energy C5 and C7 conformers of Ac-Ala-NH<sub>2</sub> with the theoretical method and basis set employed. Ramachandran and side chain  $\chi_1$  dihedrals are given in degrees, H-bond distances as well as backbone and side chain covalent bonds (two last lines of each sub-table) in pm.**

**B3LYP-D3(BJ)/def2-TZVP**

| Parameters                                                                                                  | Folded C7 | Extended C5 |
|-------------------------------------------------------------------------------------------------------------|-----------|-------------|
| $\phi$                                                                                                      | -82       | -160        |
| $\psi$                                                                                                      | 63        | 174         |
| $\chi_1$                                                                                                    | 51        | 199         |
| NHCys/NH <sub>2</sub> ---O                                                                                  | 200       | 211         |
| NHCys/NH <sub>2</sub> ---S                                                                                  | 257       | 249         |
| SH---O                                                                                                      | 236       |             |
| C7 --- CO: 123/122; SH:134; NH <sub>2</sub> : 101/101; NH: 101; CC: 151/155/153(SC); CS:183; CN:135/145/135 |           |             |
| C5 --- CO: 122/122; SH:134; NH <sub>2</sub> : 101/101; NH: 101; CC: 151/154/154(SC); CS:183; CN:136/144/135 |           |             |

**B3LYP-D3(BJ)/def2-TZVPPD**

| Parameters                                                                                                  | Folded C7 | Extended C5 |
|-------------------------------------------------------------------------------------------------------------|-----------|-------------|
| $\phi$                                                                                                      | -82       | -160        |
| $\psi$                                                                                                      | 63        | 174         |
| $\chi_1$                                                                                                    | 51        | 198         |
| NHCys/NH <sub>2</sub> ---O                                                                                  | 199       | 212         |
| NHCys/NH <sub>2</sub> ---S                                                                                  | 258       | 250         |
| SH---O                                                                                                      | 237       |             |
| C7 --- CO: 123/122; SH:134; NH <sub>2</sub> : 101/101; NH: 101; CC: 151/155/153(SC); CS:183; CN:135/145/135 |           |             |
| C5 --- CO: 122/122; SH:134; NH <sub>2</sub> : 101/101; NH: 101; CC: 151/154/154(SC); CS:183; CN:136/144/135 |           |             |

**B97-D3(BJ)-abc/def2-TZVPPD**

| Parameters                                                                                                  | Folded C7 | Extended C5 |
|-------------------------------------------------------------------------------------------------------------|-----------|-------------|
| $\phi$                                                                                                      | -82       | -159        |
| $\psi$                                                                                                      | 64        | 173         |
| $\chi_1$                                                                                                    | 51        | 198         |
| NHCys/NH <sub>2</sub> ---O                                                                                  | 199       | 213         |
| NHCys/NH <sub>2</sub> ---S                                                                                  | 257       | 249         |
| SH---O                                                                                                      | 237       |             |
| C7 --- CO: 124/123; SH:135; NH <sub>2</sub> : 102/101; NH: 101; CC: 152/156/153(SC); CS:183; CN:136/146/135 |           |             |
| C5 --- CO: 123/123; SH:135; NH <sub>2</sub> : 101/101; NH: 101; CC: 152/154/155(SC); CS:183; CN:136/144/136 |           |             |

**RI-B97-D3(BJ)-abc/def2-TZVPPD**

| Parameters                                                                                                  | Folded C7 | Extended C5 |
|-------------------------------------------------------------------------------------------------------------|-----------|-------------|
| $\phi$                                                                                                      | -82       | -158        |
| $\psi$                                                                                                      | 64        | 173         |
| $\chi_1$                                                                                                    | 51        | 198         |
| NHCys/NH <sub>2</sub> ---O                                                                                  | 200       | 214         |
| NHCys/NH <sub>2</sub> ---S                                                                                  | 257       | 249         |
| SH---O                                                                                                      | 239       |             |
| C7 --- CO: 124/123; SH:135; NH <sub>2</sub> : 102/101; NH: 101; CC: 152/156/153(SC); CS:183; CN:136/146/135 |           |             |
| C5 --- CO: 123/123; SH:135; NH <sub>2</sub> : 101/101; NH: 101; CC: 152/154/155(SC); CS:183; CN:136/144/136 |           |             |



Figure S1: Structure of the *trans*-Me-CONH-Me...MeSH intermolecular complex at the DFT-D (RI-B97-D3/def2-TZVPPD) level of theory.

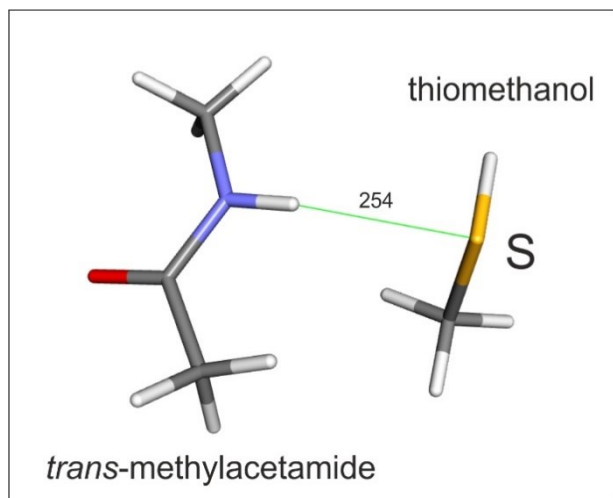

Supplement: d0cp03136d1.pdf [file d0cp03136d1.pdf]
